# Supplementary material for: Cancer cell specific inhibition of Wnt/β-catenin signaling by forced intracellular acidification
Source: PubMed Central journal article supplement (PMC6028397; doi:10.1038/s41421-018-0033-2), 2018-07-03

Supplementary Information for:

**Cancer cell specific inhibition of Wnt/ $\beta$ -catenin signaling by forced intracellular acidification**

Svitlana Melnik<sup>1,2,12</sup>, Dmytro Dvornikov<sup>3,4,12</sup>, Karin Müller-Decker<sup>5</sup>, Sofia Depner<sup>3</sup>, Peter Stannek<sup>6</sup>, Michael Meister<sup>4,7</sup>, Arne Warth<sup>4,8</sup>, Michael Thomas<sup>4,7</sup>, Thomas Muley<sup>4,7</sup>, Angela Risch<sup>1,4,9,10</sup>, Christoph Plass<sup>1</sup>, Ursula Klingmüller<sup>3,4</sup>, Christof Niehrs<sup>6,11</sup>, Andrey Glinka<sup>6\*</sup>.

\*To whom correspondence should be addressed:

E-mail: [glinka@dkfz.de](mailto:glinka@dkfz.de)

This pdf file includes:

Supplementary Tables 1-2

Supplementary Figures 1-10

**Supplementary Table 1.** Summary of clinical and mRNA expression data for the lung cancer patients cohort used in this study

| <b>Category</b>                                             | <b>Non-diabetic</b> | <b>Metformin-taking diabetic</b> |
|-------------------------------------------------------------|---------------------|----------------------------------|
| Number of patients                                          | 66                  | 42                               |
| Age, median (range)                                         | 63 (43 – 80)        | 69 (53 – 79)                     |
| Male/Female                                                 | 52/14               | 33/9                             |
| NS/FS/S/U                                                   | 5/35/26/0           | 2/23/16/1                        |
| ECOG 0/1/unknown                                            | 55/9/2              | 38/4/0                           |
| p-stage I/II/III                                            | 20/24/22            | 9/13/18*                         |
| <b>Histology</b>                                            |                     |                                  |
| Squamous cell                                               | 26                  | 19                               |
| Adenocarcinoma                                              | 30                  | 16                               |
| Large cell                                                  | 4                   | 2                                |
| Other (lung metastases and secondary malignant lung tumors) | 6                   | 5                                |
| Postoperative chemotherapy                                  | 36                  | 16                               |
| Postoperative radiotherapy                                  | 18                  | 5                                |
| Recurrence (local, distant, 2nd tumor)                      | 29                  | 20                               |
| Dead                                                        | 29                  | 15                               |
| <b>mRNA expression, Mean value ± SEM</b>                    |                     |                                  |
| <i>AXIN2</i>                                                | 1.89±0.45           | 2.22±0.22                        |
| <i>SOX4</i>                                                 | 3.77±0.45           | 3.01±0.28                        |
| <i>DDIT3</i>                                                | 4.03±0.58           | 5.09±2.23                        |
| <i>VIM</i>                                                  | 1.59±0.16           | 2.01±0.31                        |
| <i>ZEB1</i>                                                 | 1.30±0.10           | 2.36±0.36                        |

\* – no stage was assigned

NS – non-smoker

FS – former smoker

S – smoker

U – unknown

**Supplementary Table 2.** List of primers used in this study

| <b>Gene Name</b> | <b>Sequence</b>                                                                                    | <b>UPL</b> | <b>Assay</b> |
|------------------|----------------------------------------------------------------------------------------------------|------------|--------------|
| <i>DDIT3</i>     | CCCATCGATGCCACCATGGCAGCTGAGTCATTGCC<br>CCCTCTAGATTATGCTTGGTGCAGATTCACC                             |            | Cloning      |
| <i>EC-GFP</i>    | CCCGGATCCGCCACCATGAGTAAAGGAGAAGAAC<br>TTTTCACTGGAG<br>CCCGAATTCTTATTTGTATATTTTCATCCATGCCATG<br>TGT |            | Cloning      |
| <i>SOX4</i>      | CAACGCCAACTCCAGCTC<br>ACCGACCTTGTCTCCCTTC                                                          | 25         | qRT-PCR      |
| <i>AXIN2</i>     | CCACACCCTTCTCCAATCC<br>TGCCAGTTTCTTTGGCTCTT                                                        | 36         | qRT-PCR      |
| <i>ESD</i>       | TTAGATGGACAGTTACTCCCTGATAA<br>GGTTGCAATGAAGTAGTAGCTATGA                                            | 27         | qRT-PCR      |
| <i>ZEB1</i>      | TTTTTCCTGAGGCACCTGAA<br>AAAATGCATCTGGTGTTCCAT                                                      | 28         | qRT-PCR      |
| <i>GAPDH</i>     | GCATCCTGGGCTACACTGAG<br>AGGTGGAGGAGTGGGTGTC                                                        | 82         | qRT-PCR      |
| <i>VIM</i>       | TACAGGAAGCTGCTGGAAG<br>ACCAGAGGGAGTGAATCCAG                                                        | 24         | qRT-PCR      |
| <i>DDIT3</i>     | CAGAGCTGGAACCTGAGGAG<br>TGGATCAGTCTGGAAAAGCA                                                       | 9          | qRT-PCR      |
| <i>ATF6</i>      | CTTTTAGCCCGGGACTCTTT<br>TCAGCAAAGAGAGCAGAATCC                                                      | 42         | qRT-PCR      |
| <i>ATF4</i>      | GGTCAGTCCCTCCAACAACA<br>CTATACCCAACAGGGCATCC                                                       | 88         | qRT-PCR      |
| <i>ATF2</i>      | TTTGGTCCAGCACGTAATGA<br>CAAACCCACTTCTTCACAGTTTT                                                    | 5          | qRT-PCR      |
| <i>PERK</i>      | CCAGCCTTAGCAAACCAGAG<br>TCTTGGTCCCACTGGAAGAG                                                       | 58         | qRT-PCR      |
| <i>IRE1</i>      | TGAGGACGAAGGGGACTACA<br>ACGTCCCCAGATTCAGTGC                                                        | 9          | qRT-PCR      |
| <i>GPD2</i>      | CGGACAACGAGAAGTCGTC<br>AGTCCTAAAACAGTTGCAAGAGC                                                     | 25         | qRT-PCR      |
| <i>AMPK1</i>     | TCTCAGGAGGAGAGCTATTTGATT<br>GAACAGACGCCGACTTTCTTT                                                  | 42         | qRT-PCR      |

|                                          |                                                    |    |               |
|------------------------------------------|----------------------------------------------------|----|---------------|
| <i>AMPK2</i>                             | ACCCACTGAAACGAGCAACT<br>AGGAAGGGTCTTCAGGAAATAAG    | 61 | qRT-PCR       |
| <i>LGR5</i>                              | ACCAGACTATGCCTTTGGAAAC<br>TTCCAGGGAGTGGATTCTAT     | 78 | qRT-PCR       |
| <i>DDIT3</i>                             | CCCATTATCCTGCAGATGTGC<br>CTTCCTTCAAGGAAATGAGGAAAGG |    | genotyping    |
| <i>SOX4</i><br><i>upstream</i>           | ACAGATCCAGTCAGATGGCTAC<br>AGTATGTAGGCTGGCAATAGGC   |    | qPCR,<br>ChIP |
| <i>SOX4</i><br><i>promoter</i><br>(-800) | TGGGCTATGCAGGATTTACAGG<br>TTGTGCTGTTTGTGGAAGG      |    | qPCR,<br>ChIP |
| <i>SOX4</i><br><i>promoter</i><br>(-400) | AGCTGGGGAACAGATTTTGC<br>ATAACAAGGG GCTTGGAACG      |    | qPCR,<br>ChIP |
| <i>SOX4</i><br><i>exon</i>               | ACATCAAGCGACCCATGAAC<br>TTGTCGCTGTCTTTGAGCAG       |    | qPCR,<br>ChIP |
| <i>SOX4</i><br><i>downstream</i>         | TGCCCAATGCCTAAGATTGG<br>AGAGGAAATCTGGCCAAGAGAC     |    | qPCR,<br>ChIP |
| <i>GAPDH</i>                             | GGGGCCTGTTTTGTTGTCAT<br>GGGCCGTGTGATTCTTTGTT       |    | qPCR,<br>ChIP |
| <i>AXIN2</i> <sup>42</sup>               | GGAGCAGTAAAAGGCCGTAA<br>CCAAACCATTGAAGCCCTTA       |    | qPCR,<br>ChIP |

### Supplementary figure legends

**Supplementary Figure 1** *SOX4* is a Wnt-inducible gene. (a-e) Levels of the indicated mRNA and proteins in the indicated cell lines were monitored by qRT-PCR or WB, respectively. **a**, H1299 cells were treated with: WntCM, epidermal growth factor (EGF, 50 ng/ml), insulin-like growth factor (IGF, 40 ng/ml), basic fibroblast growth factor (bFGF, 1 ng/ml) or insulin (10 µg/ml). Position of unspecific band used as a loading control is indicated by asterisk. Endogenous β-catenin from cytosolic extracts was used as a control of Wnt pathway activation. **b**, H1299 cells were treated with WntCM, as indicated. **c**, Cells were treated with WntCM for 48 h and subjected to siRNA-mediated β-catenin knockdown for 76 h. **d**, H1299 cells were transiently transfected with control or β-catenin-expressing vectors for 72 h. (a-d) Error bars represent mean values ± SD. **e**, Cells were subjected to siRNA-mediated knockdown of β-catenin for 48 h.

**Supplementary Figure 2** Metformin affects Wnt signaling in lung cancer patients.

Non-linear Spearman's rank correlation analysis of *VIM* or *ZEB1* mRNA expression levels with Wnt signaling (*AXIN2*) in tumor tissue samples from lung cancer patients, non-diabetic or Metformin-taking diabetic.  $\rho$  – Spearman's rank coefficient for non-linear correlation:  $P \leq 0.05$  (\*); ns – not significant; n – number of patients.

**Supplementary Figure 3** Metformin's effects on SOX4 could not be imitated by interference with GPD2 or AMPK functions. Levels of the indicated mRNAs and proteins were monitored by qRT-PCR or WB, respectively, in the indicated cell lines, subjected to siRNA-mediated knockdown of *GPD2* (a) or *AMPK1/2* (b) for 96 h, as indicated. Error bars represent mean values  $\pm$  SD.

**Supplementary Figure 4** DDIT3 is one of the key factors involved in SOX4 repression upon Metformin treatment. (a-c) Levels of the indicated mRNA and proteins in the indicated cell lines, treated with WntCM and Metformin, as indicated, were monitored by qRT-PCR or WB, respectively. Asterisk indicates a position of DDIT3 protein band migration. c, DLD1 cells were pre-treated with Metformin for 72 h and later transferred into fresh media for the indicated time period. d, TOPFLASH luciferase reporter assay in HEK293T cells: Wnt signaling was activated by co-transfection of *LRP6* with *wnt8-frizzled5* fusion constructs (*LRP6/W/Fz*) or by  $\beta$ -*catenin*, in presence of or without *DDIT3* expression construct. Experiment was done in triplicates, error bars correspond to mean values  $\pm$  SD; RLA – relative luciferase activity. e, Confirmation of DDIT3 knockout in H1975 cell line generated with CRISPR/Cas9 genome editing system. Top: Genotyping result showed a single nucleotide insertion mutation (marked by asterisk) in a selected clone that caused translation frame shift. No wildtype alleles were detected for the selected clone after multiple sequencing. Bottom: H1975 wildtype cells and the selected mutant clone were treated with 5  $\mu$ g/ml Tunicamycin, 60 nM Nigericin or 20 nM Bortezomib for 48 h, and DDIT3 protein induction was monitored by WB.

**Supplementary Figure 5** Efficiency of siRNA-mediated knockdown experiments performed in this study was controlled by qRT-PCR. a, Samples from experiment presented in Fig. 3a. d, Samples from experiment presented in Fig. 3f.

**Supplementary Figure 6** The UPR-inducing drugs induce DDIT3 and reduce protein levels of SOX4. (a-b) Levels of the indicated proteins in the indicated cell lines treated with WntCM and different drugs were monitored by WB. Asterisk indicates position of unspecific band used as a loading control. b, H1299 cells were transfected with  $\beta$ -*catenin* expression construct for 72 h and treated with Metformin or Tunicamycin, as indicated. c, 3D cell invasion assay done with H1299 cells treated with WntCM and the indicated drugs (6 mM Metformin or 5 nM Bortezomib) for 96 h. Cells were fixed and imaged using confocal microscopy. Bottom: Representative images of 3D cell invasion assay. Experiment was done with 5 biological replicates, error bars correspond to mean values  $\pm$  SD.

$P < 0.0001$  (\*\*\*\*). Scale bar, 150  $\mu\text{m}$ .

**Supplementary Figure 7** Mitochondrial complex I inhibitors cause intracellular acidification.

(a-c) Fluorometric measurements of pHi changes (EC-GFP/mCherry) in DLD1<sup>EC-GFP/mCherry</sup> cells upon treatment with increasing concentrations of the indicated MCI inhibitor drugs for 72 h. **b**, pHi calibration curve built for conversion of EC-GFP/mCherry ratio values to pHi. DLD1<sup>EC-GFP/mCherry</sup> cells were exposed to standard calibrating solutions with pH range from 6.2 to 8.8, for 0.5 h, before fluorometry. **c**, Treatment was done as in **a**, using increasing concentrations of MCII inhibitor, Lonidamine, in presence or without of 5 nM Monensin. Error bars correspond to mean values  $\pm$  SD for 6 biological replicates. (a, c) Positions of black lines on the right indicate a range of pHi changes caused by the treatments. The pHi values were converted from EC-GFP/mCherry ratios using the calibration curve presented in **b**.

**Supplementary Figure 8** Only when drug treatment causes intracellular acidification, it blocks Wnt signaling.

**a**, Fluorometric measurements of pHi changes (EC-GFP/mCherry) in DLD1<sup>EC-GFP/mCherry</sup> cells upon treatment with increasing concentrations of the indicated monocarboxylate transporter (MCT) inhibitors: CHC (2-Cyano-3-(4-hydroxyphenyl)-2-propenoic acid) and AZD3965, or carbonic anhydrases (CA) inhibitor (Azetazolamide) for 72 h, as indicated. **b**, Levels of indicated proteins were monitored by WB in H1299 cells treated with indicated drugs (as in **a**, for 72 h) and induced with WntCM for 48 h.

**Supplementary Figure 9** Drugs, selected according to the ‘Warburg Trap’ model, cooperatively drop pHi and inhibit Wnt signaling.

**a**, Confocal microscopy in H1975<sup>EC-GFP</sup> cells treated with combinations of Rotenone and Nigericin, or Papaverine and Salinomycin, as indicated. Live cells were imaged at 405 nm and 488 nm excitations to record control and pH-sensitive GFP emissions, respectively. Scale bar, 150  $\mu\text{m}$ . (b-c) Levels of the indicated proteins in the indicated cell lines treated as in **Fig. 5b** (H1975 and MDA-MB-231, **b**), or as indicated (MRC5, **b**; or H1299, **c**), were evaluated by WB. **d**, qRT-PCR analysis of the indicated mRNAs expression levels in the samples from the experiment presented in **Fig. 5c**. **e**, ATP concentration measurements in the indicated cell lines treated with Rotenone/Nigericin, as indicated. Error bars correspond to mean values  $\pm$  SD for 6 biological replicates;  $P = 0.0042$  (\*\*); ns – not significant.

**Supplementary Figure 10** Drugs, selected according to the ‘Warburg Trap’ model, cooperatively affect cancer cells viability and inhibit SOX4 protein accumulation, also in presence of ROS scavengers.

**a**, Cell viability measured in the indicated cell lines with the indicated drug combinations. Assay was done as in **Fig. 5f**. Error bars correspond to mean values  $\pm$  SD for 6 biological replicates. **b**, The indicated cell lines were treated with different drug combinations: 10 nM Nigericin (Nig), 5nM

Rotenone (Rot), 1  $\mu$ M Papaverine-HCl (Pap), 10 nM Salinomycin (Sal), in presence or without of 1mM NAC (N-acetyl cysteine), 20  $\mu$ M Doxycycline, 20  $\mu$ M Minocycline, 100 $\mu$ M Trolox (soluble form of vitamin E), as indicated, and levels of SOX4 protein were evaluated with WB.

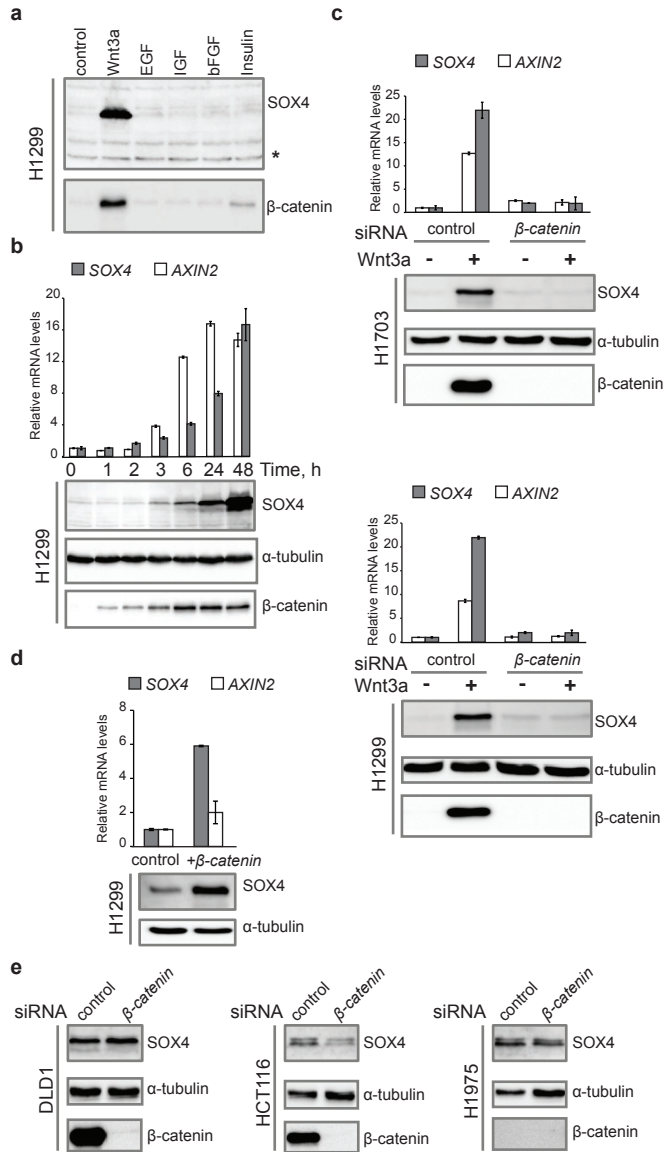



Melnik *et al.*, Supplementary Figure 2

Non-diabetic lung cancer patients,  
n=50

Metformin-taking diabetic lung cancer  
patients, n=34

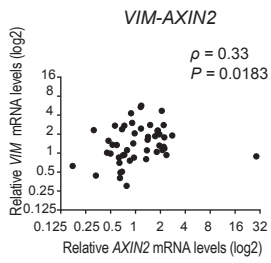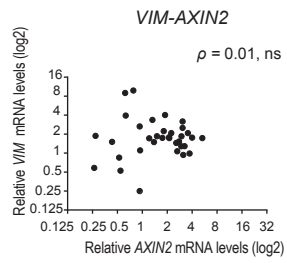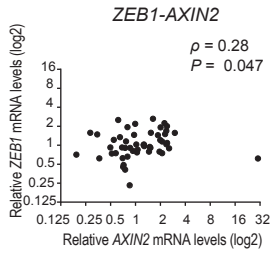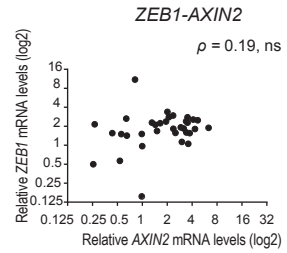

Melnik *et al.*, Supplementary Figure 3

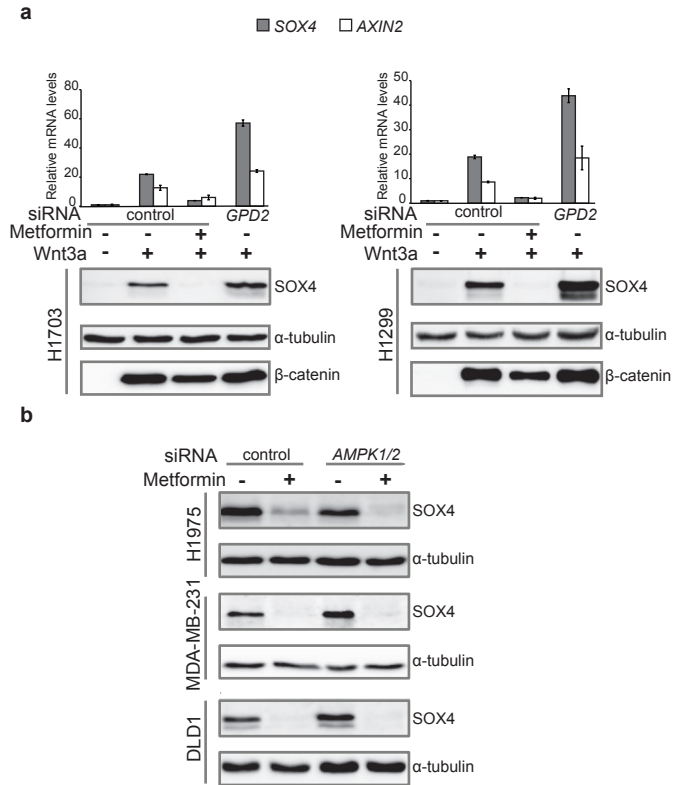

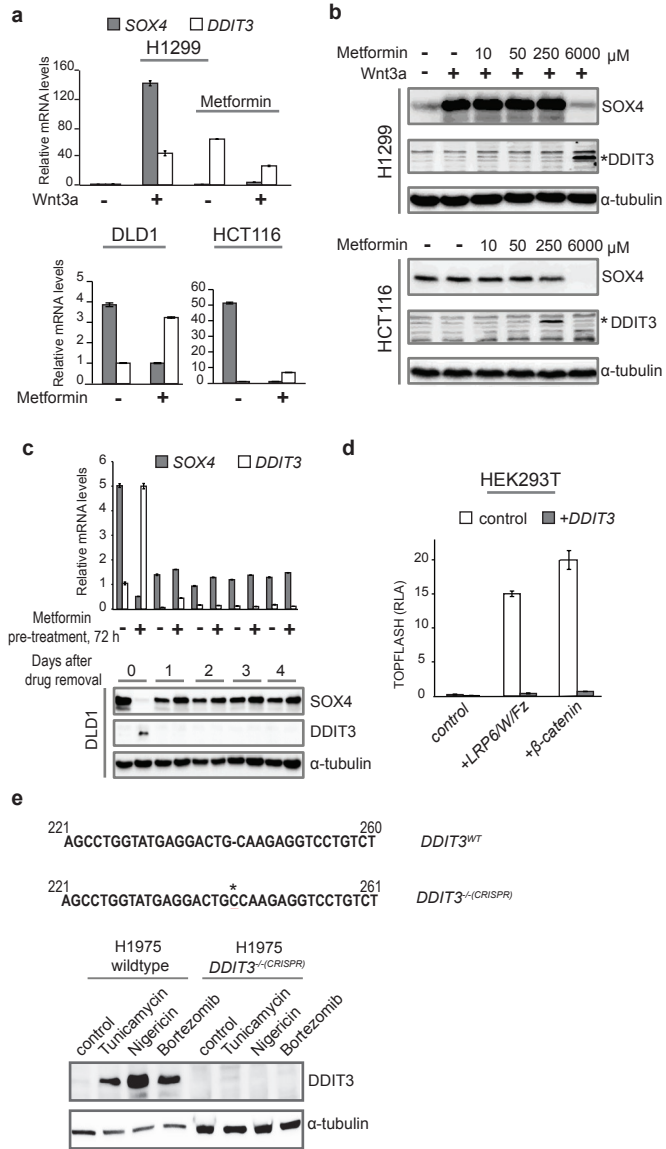

Melnik et al., Supplementary Figure 5

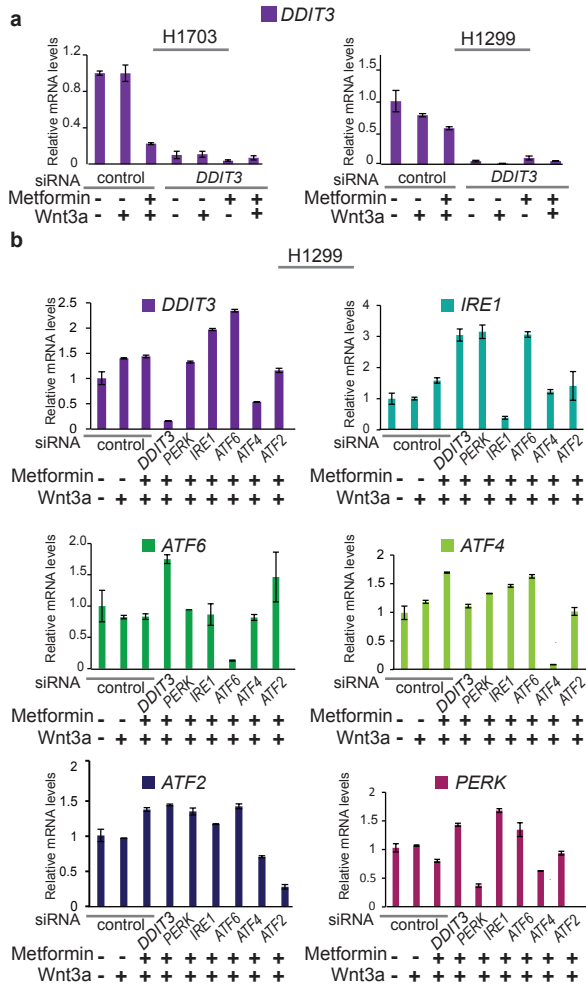

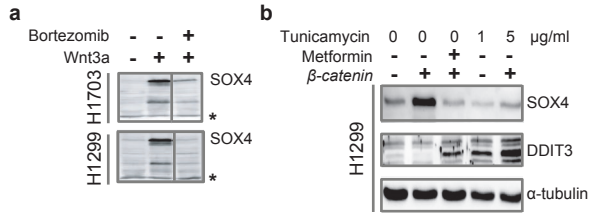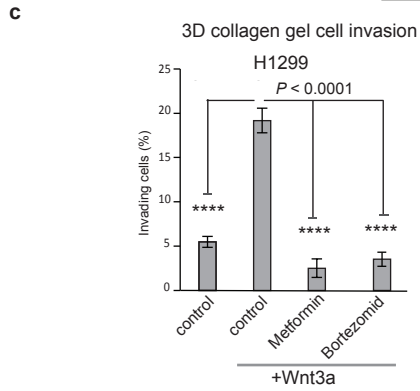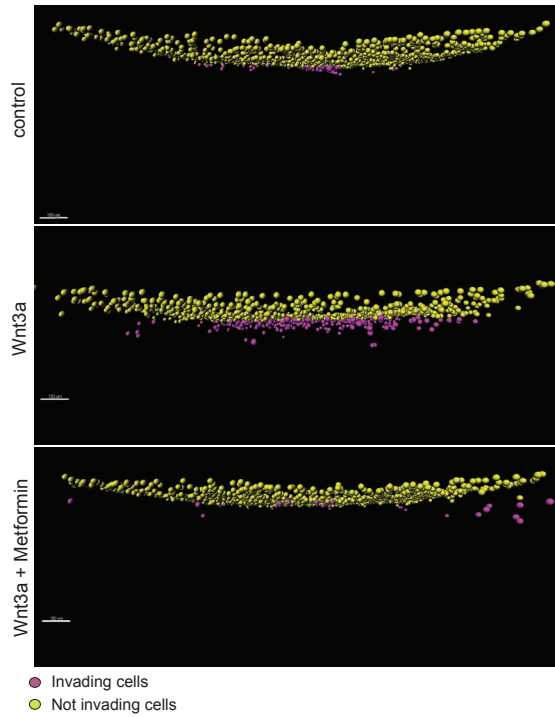

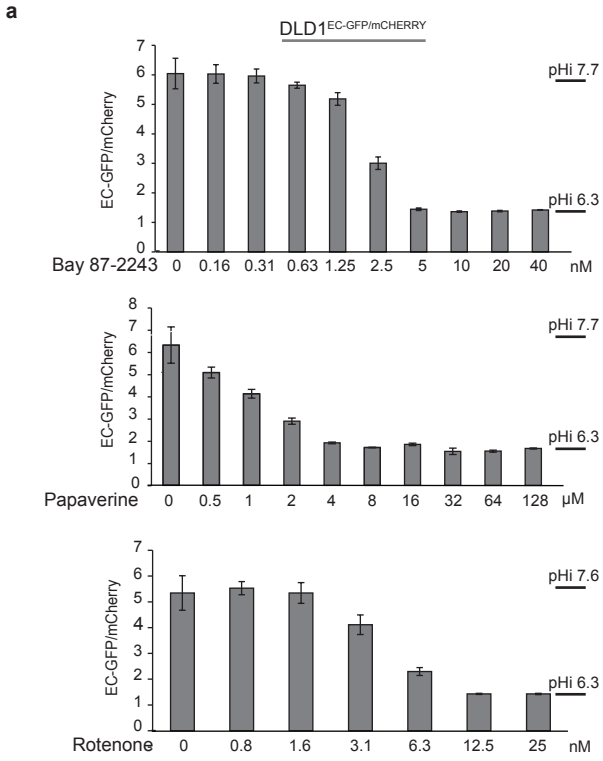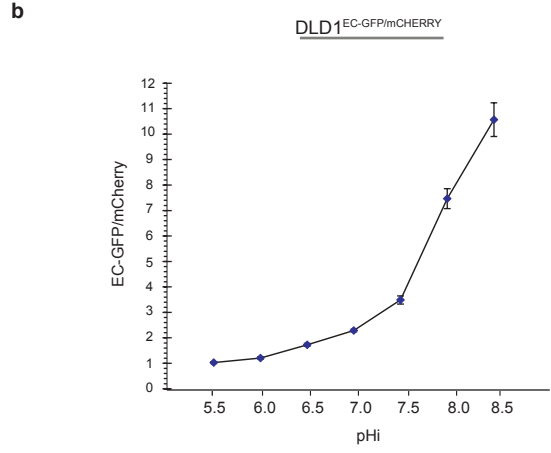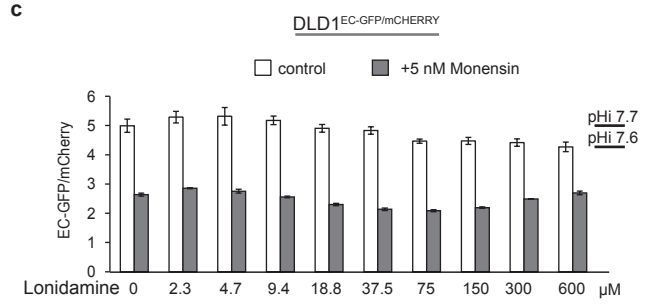

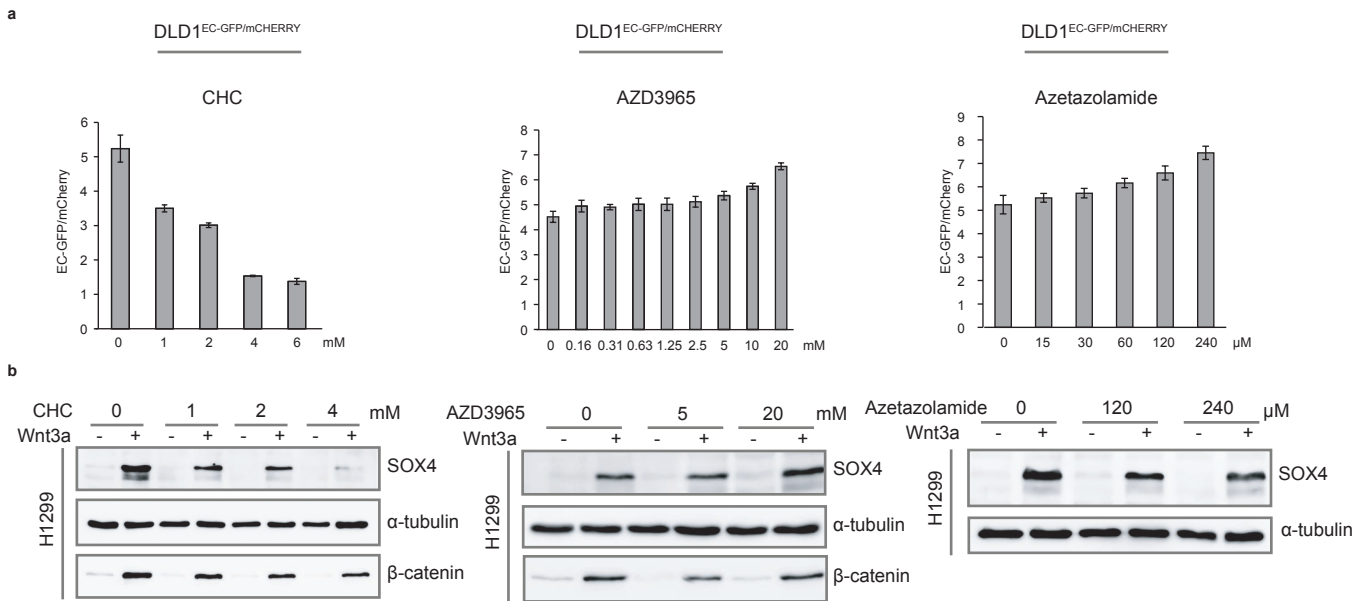

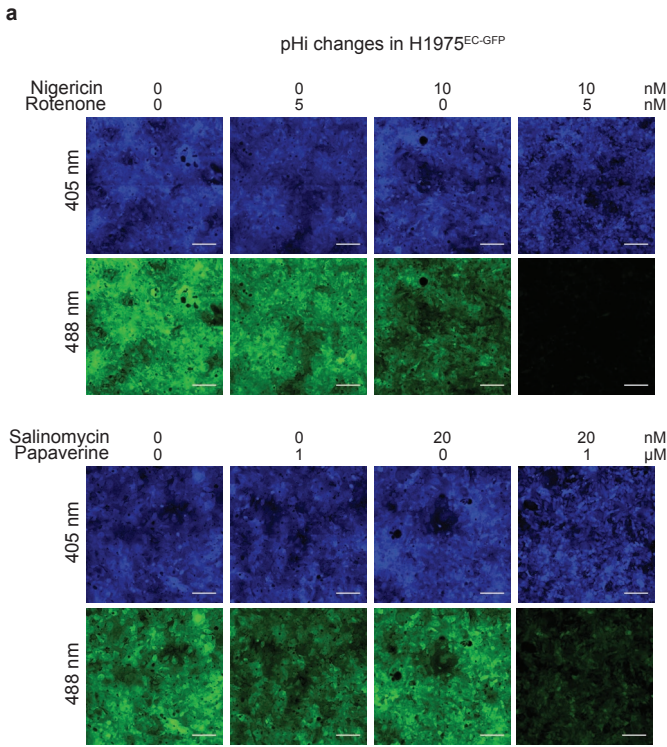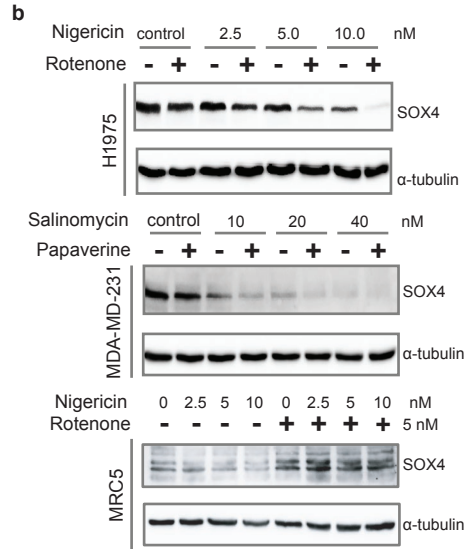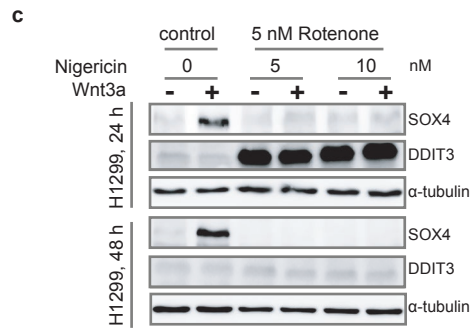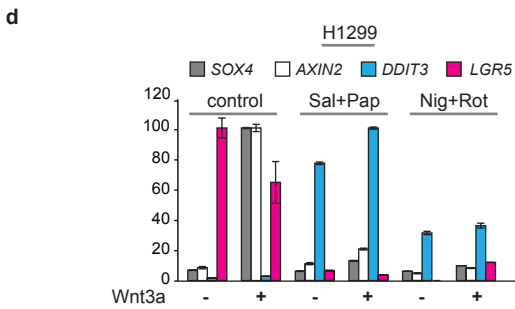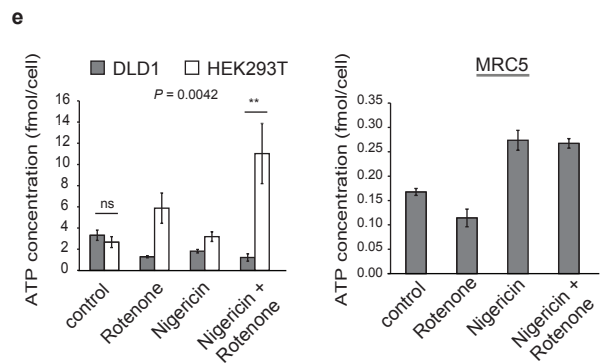



**a**

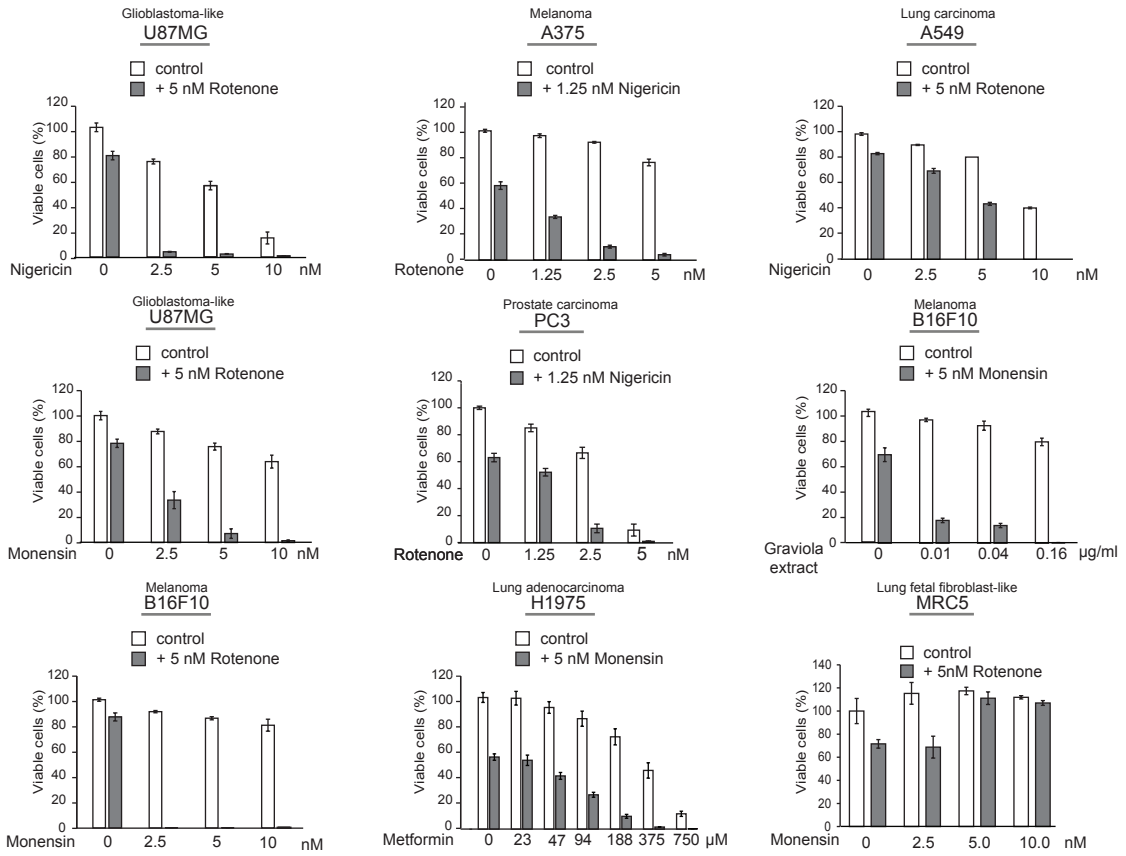

**b**

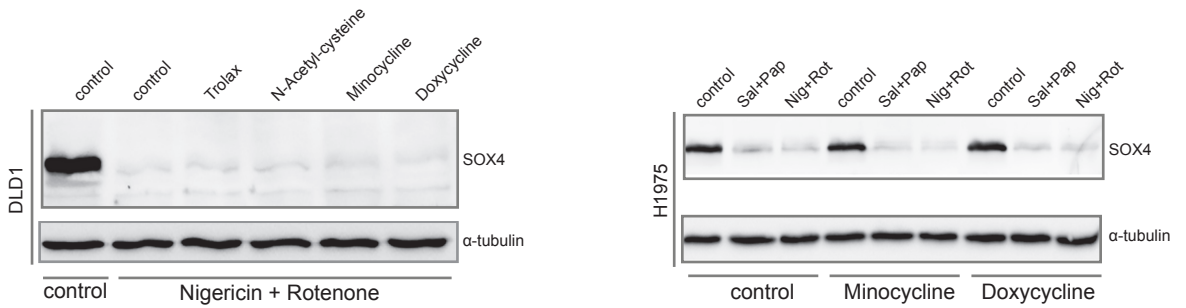

Supplement: 41421_2018_33_MOESM1_ESM.pdf [file 41421_2018_33_MOESM1_ESM.pdf]
